# Supplementary material
Source: Springer Nature journal article supplement (https://www.springermedizin.de/resource/supplementary/12894_2013_316_MOESM4_ESM.pdf/9513452)

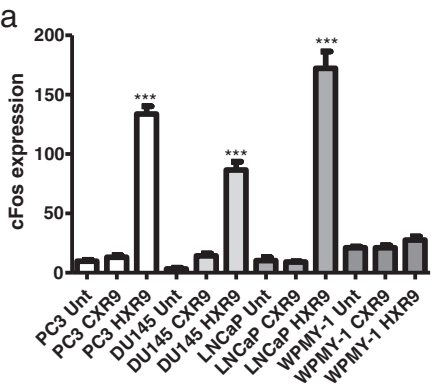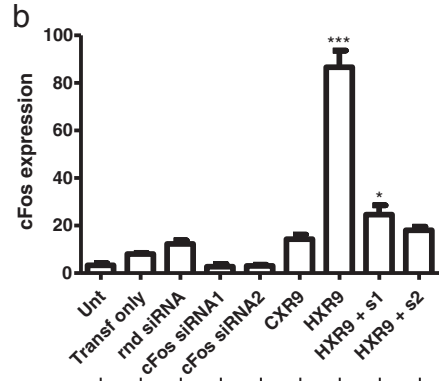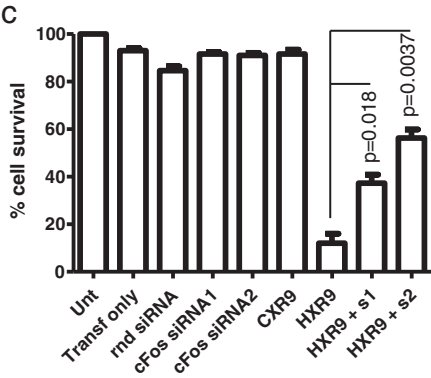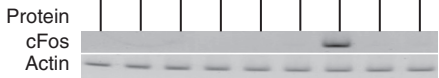

Supplement: MOESM4 [file 9513452]
